# Supplementary material for: DFT Study of the Direct Radical Scavenging Potency of Two Natural Catecholic Compounds
Source: MDPI journal article supplement (doi:10.3390/ijms232214497), 2022-11-21
Supplement: s1 [file s1]

## SUPPLEMENTARY MATERIALS

### Chart S1.

Graphically presented correlations between thermodynamic and kinetic parameters for reaction of quercetin with  $\text{CH}_3\text{OO}^\bullet$  in pentyl ethanoate.

| path | BDE<br>kcal/mol | $\Delta_r G$<br>kcal/mol | $\nu$<br>$\text{cm}^{-1}$ | $\Delta G^\ddagger$<br>kcal/mol | $k^{\text{TST}}$<br>$\text{M}^{-1} \text{s}^{-1}$ | $k^{\text{TST/Eck}}$<br>$\text{M}^{-1} \text{s}^{-1}$ | $k^{\text{TST/Wig}}$<br>$\text{M}^{-1} \text{s}^{-1}$ |
|------|-----------------|--------------------------|---------------------------|---------------------------------|---------------------------------------------------|-------------------------------------------------------|-------------------------------------------------------|
| C-3  | 85.41           | 0.9                      | -3307                     | 22.7                            | $1.4 \times 10^{-4}$                              | $2.6 \times 10^0$                                     | $1.6 \times 10^{-3}$                                  |
| C-5  | 99.41           | 14.9                     | -2631                     | 30.6                            | $2.5 \times 10^{-10}$                             | $3.0 \times 10^{-8}$                                  | $1.9 \times 10^{-9}$                                  |
| C-7  | 94.55           | 10.4                     | -2456                     | 23.3                            | $4.9 \times 10^{-5}$                              | $6.4 \times 10^{-4}$                                  | $3.3 \times 10^{-4}$                                  |
| C-3' | 82.36           | -1.1                     | -2227                     | 16.3                            | $7.2 \times 10^0$                                 | $4.7 \times 10^2$                                     | $4.2 \times 10^1$                                     |
| C-4' | 80.35           | -3.5                     | -2259                     | 16.5                            | $4.7 \times 10^0$                                 | $3.6 \times 10^2$                                     | $2.8 \times 10^1$                                     |

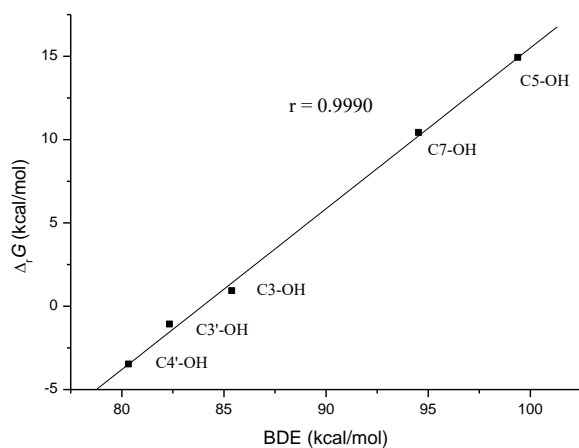

a) Plot of  $\Delta_r G$  vs the O-H BDE.

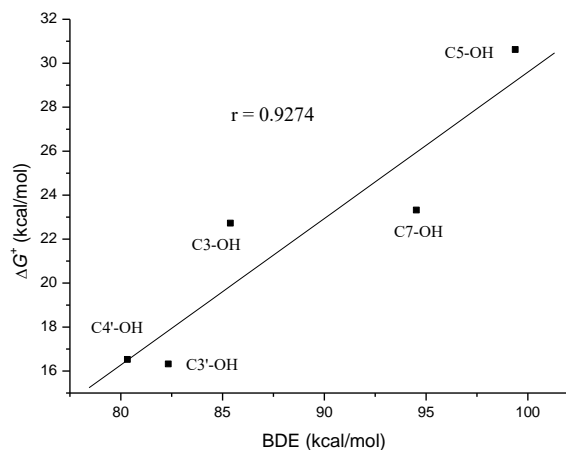

b) Plot of  $\Delta G^\ddagger$  vs the O-H BDE.

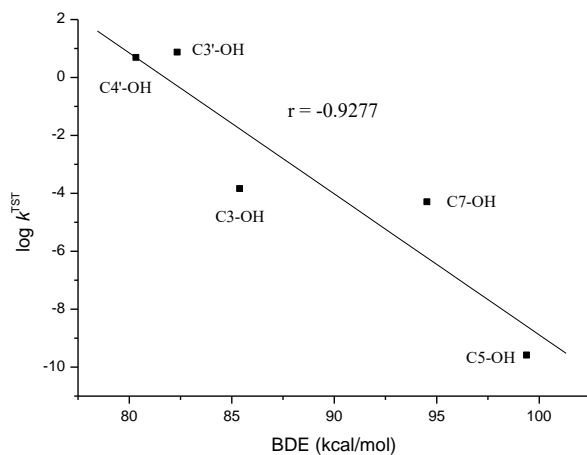

c) Plot of  $\log k^{\text{TST}}$  vs the O-H BDE.

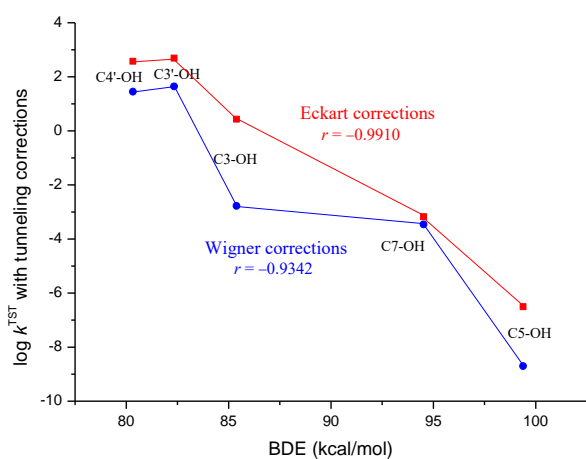

d) Plot of  $\log k^{\text{TST/Eck}}$  ( $k^{\text{TST/Wig}}$ ) vs the O-H BDE.

## Chart S2.

Graphically presented correlations between thermodynamic and kinetic parameters for reaction of quercetin with  $\text{HOO}^\bullet$  in pentyl ethanoate.

| path | BDE<br>kcal/mol | $\Delta_r G$<br>kcal/mol | $\nu$<br>$\text{cm}^{-1}$ | $\Delta G^\ddagger$<br>kcal/mol | $k^{\text{TST}}$<br>$\text{M}^{-1} \text{s}^{-1}$ | $k^{\text{TST/Eck}}$<br>$\text{M}^{-1} \text{s}^{-1}$ | $k^{\text{TST/Wig}}$<br>$\text{M}^{-1} \text{s}^{-1}$ |
|------|-----------------|--------------------------|---------------------------|---------------------------------|---------------------------------------------------|-------------------------------------------------------|-------------------------------------------------------|
| C-3  | 85.41           | -1.3                     | -4274                     | 18.3                            | $2.3 \times 10^{-1}$                              | $2.4 \times 10^3$                                     | $4.3 \times 10^0$                                     |
| C-5  | 99.41           | 12.7                     | -3894                     | 27.2                            | $7.8 \times 10^{-8}$                              | $1.8 \times 10^{-5}$                                  | $1.2 \times 10^{-6}$                                  |
| C-7  | 94.55           | 8.1                      | -2521                     | 23.3                            | $5.2 \times 10^{-5}$                              | $5.0 \times 10^{-3}$                                  | $3.7 \times 10^{-4}$                                  |
| C-3' | 82.36           | -3.4                     | -1884                     | 16.3                            | $7.6 \times 10^0$                                 | $2.8 \times 10^2$                                     | $3.4 \times 10^1$                                     |
| C-4' | 80.35           | -5.8                     | -1843                     | 16.4                            | $6.1 \times 10^0$                                 | $2.1 \times 10^2$                                     | $2.6 \times 10^1$                                     |

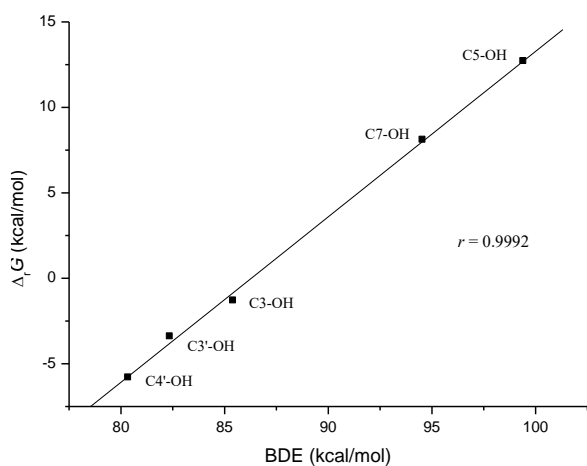

a) Plot of  $\Delta_r G$  vs the O-H BDE.

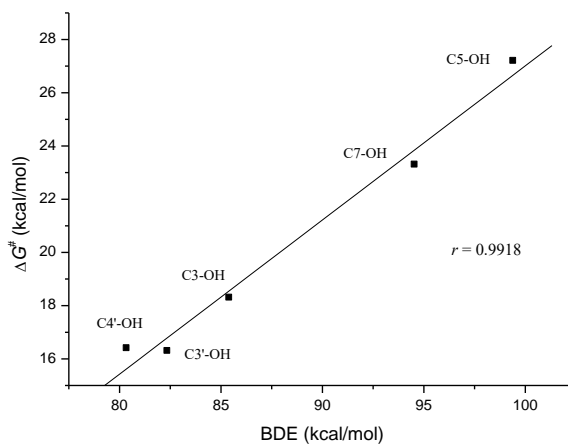

b) Plot of  $\Delta G^\ddagger$  vs the O-H BDE.

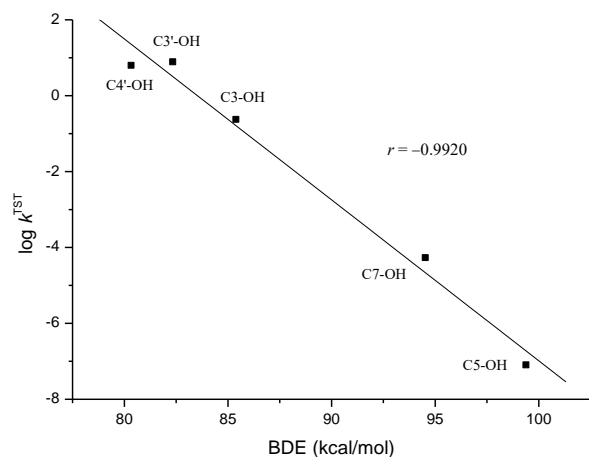

c) Plot of  $\log k^{\text{TST}}$  vs the O-H BDE.

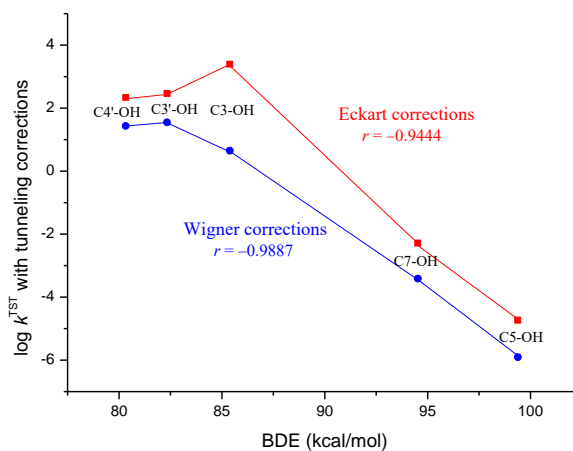

d) Plot of  $\log k^{\text{TST/Eck}}$  ( $k^{\text{TST/Wig}}$ ) vs the O-H BDE.

### Chart S3.

Graphically presented correlations between thermodynamic and kinetic parameters for reaction of rooperol with  $\text{HOO}^\bullet$  in pentyl ethanoate.

| path                     | BDE<br>kcal/mol | $\Delta_r G$<br>kcal/mol | $\nu$<br>$\text{cm}^{-1}$ | $\Delta G^\ddagger$<br>kcal/mol | $k^{\text{TST}}$<br>$\text{M}^{-1} \text{s}^{-1}$ | $k^{\text{TST/Eck}}$<br>$\text{M}^{-1} \text{s}^{-1}$ |
|--------------------------|-----------------|--------------------------|---------------------------|---------------------------------|---------------------------------------------------|-------------------------------------------------------|
| 3'-OH                    | 80.48           | -4.8                     | -1801                     | 16.3                            | $7.4 \times 10^0$                                 | $1.7 \times 10^2$                                     |
| 4'-OH                    | 77.04           | -8.0                     | -1616                     | 14.7                            | $9.7 \times 10^1$                                 | $1.1 \times 10^3$                                     |
| 3''-OH                   | 81.81           | -3.0                     | -1817                     | 17.6                            | $8.2 \times 10^{-1}$                              | $2.5 \times 10^1$                                     |
| 4''-OH                   | 79.63           | -5.3                     | -1761                     | 16.5                            | $5.0 \times 10^0$                                 | $1.2 \times 10^2$                                     |
| <sup>a</sup> allylic C-H | 72.21           | -14.1                    | -1739                     | 19.4                            | $3.6 \times 10^{-2}$                              | $1.4 \times 10^0$                                     |
| <sup>b</sup> allylic C-H | 72.21           | -14.1                    | -1730                     | 19.3                            | $4.3 \times 10^{-2}$                              | $1.6 \times 10^0$                                     |

<sup>a</sup>allylic C-H in front of the molecular plane; <sup>b</sup>allylic C-H in the back of the molecular plane

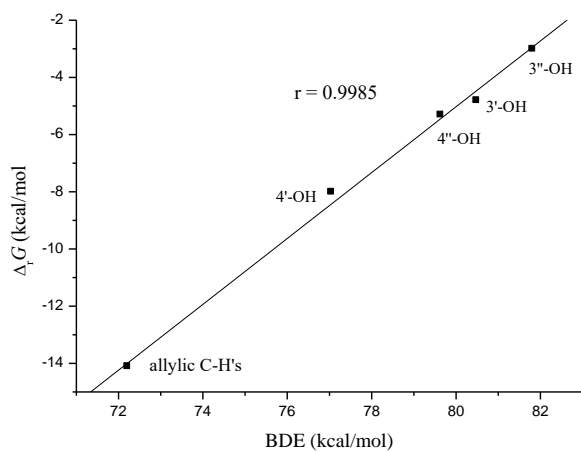

a) Plot of  $\Delta_r G$  vs BDE.

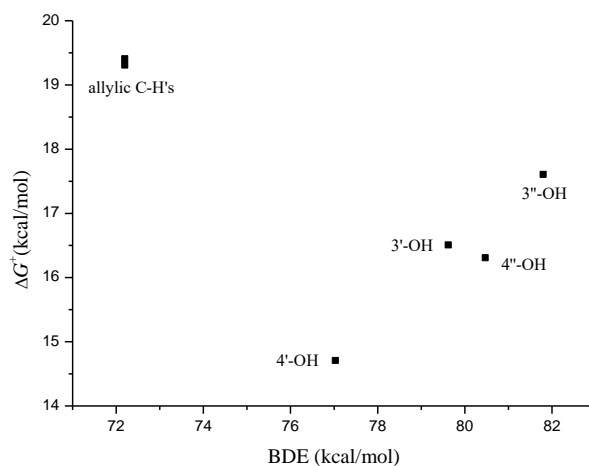

b) Plot of  $\Delta G^\ddagger$  vs BDE.

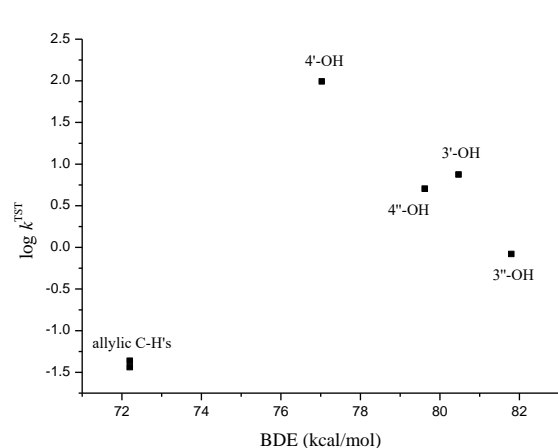

c) Plot of  $\log k^{\text{TST}}$  vs BDE.

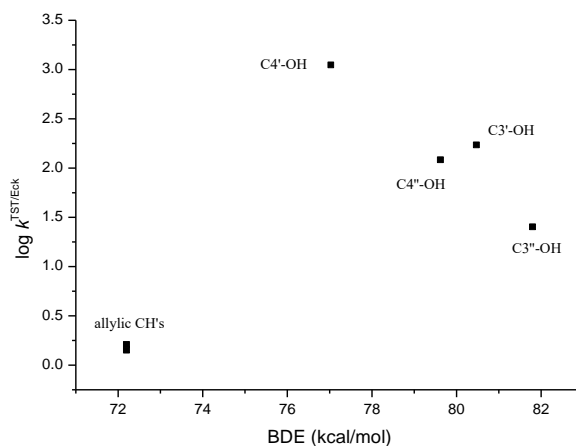

d) Plot of  $\log k^{\text{TST/Eck}}$  vs BDE.

### Chart S4.

Graphically presented correlations between thermodynamic and kinetic parameters for reaction of rooperol with  $\text{CH}_3\text{OO}^\bullet$  in pentyl ethanoate.<sup>a</sup>

| path   | BDE<br>kcal/mol | $\Delta_r G$<br>kcal/mol | $\nu$<br>$\text{cm}^{-1}$ | $\Delta G^\ddagger$<br>kcal/mol | $k^{\text{TST}}$<br>$\text{M}^{-1} \text{s}^{-1}$ | $k^{\text{TST/Eck}}$<br>$\text{M}^{-1} \text{s}^{-1}$ |
|--------|-----------------|--------------------------|---------------------------|---------------------------------|---------------------------------------------------|-------------------------------------------------------|
| 3'-OH  | 80.48           | -2.6                     | -2085                     | 17.1                            | $1.7 \times 10^0$                                 | $7.8 \times 10^1$                                     |
| 4'-OH  | 77.04           | -5.7                     | -1866                     | 15.8                            | $1.7 \times 10^1$                                 | $3.2 \times 10^2$                                     |
| 3''-OH | 81.81           | -0.7                     | -2087                     | 17.7                            | $6.7 \times 10^{-1}$                              | $3.6 \times 10^1$                                     |
| 4''-OH | 79.63           | -3.0                     | -1992                     | 17.2                            | $1.5 \times 10^0$                                 | $5.5 \times 10^1$                                     |

<sup>a</sup> Allylic paths were not considered.

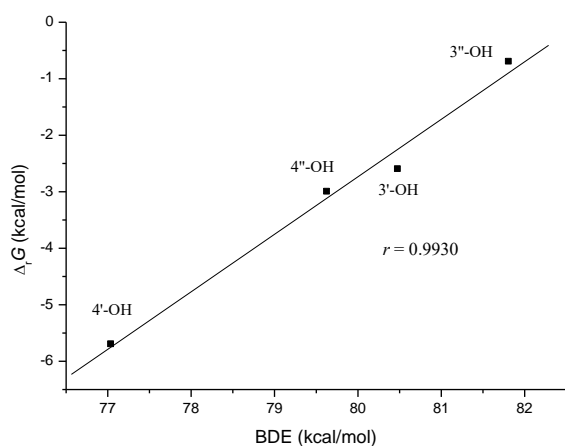

a) Plot of  $\Delta_r G$  vs BDE.

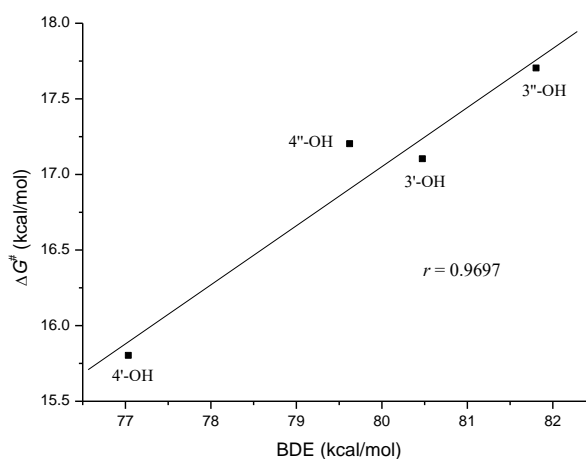

b) Plot of  $\Delta G^\ddagger$  vs BDE.

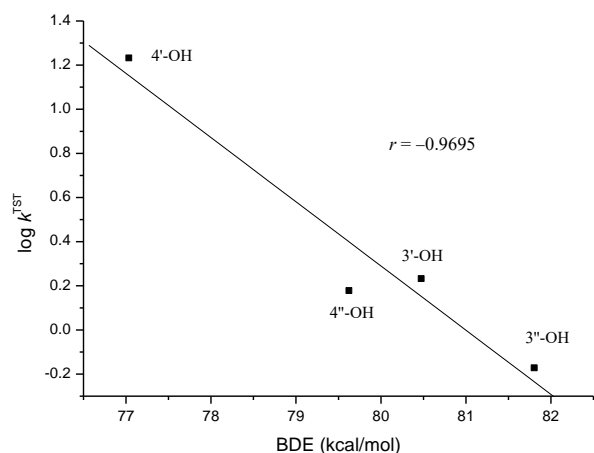

c) Plot of  $\log k^{\text{TST}}$  vs BDE.

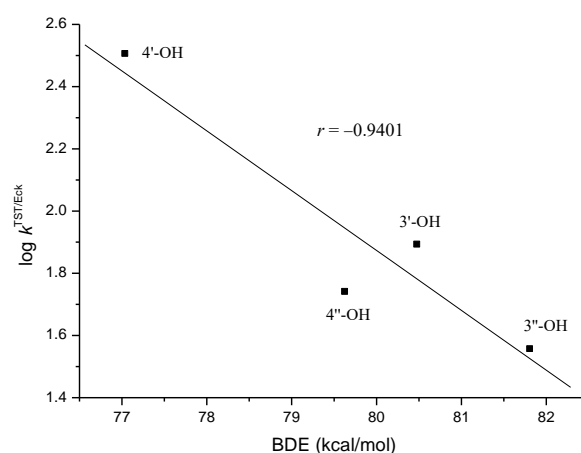

d) Plot of  $\log k^{\text{TST/Eck}}$  vs BDE.

**Table S1.** Kinetic data obtained by taking into account reactant complex and product complex for the PCET paths of quercetin with  $\text{HOO}^\bullet$  and  $\text{CH}_3\text{OO}^\bullet$  radicals, in pentyl ethanoate at 298.15 K.

$k_{\text{overall}}^{\text{TST/Eck}}$  is the sum of the rate constants of all reaction paths.<sup>a</sup>

| path                                             | BDE   | $\Delta_r G$ | $\nu$    | $\Delta G^\ddagger$ | $k^{\text{TST}}$      | $k^{\text{Eck}}$                        | $k^{\text{TST/Eck}}$ | $\Gamma$ |
|--------------------------------------------------|-------|--------------|----------|---------------------|-----------------------|-----------------------------------------|----------------------|----------|
| <b><math>\text{HOO}^\bullet</math></b>           |       |              |          |                     |                       |                                         |                      |          |
| 3-OH                                             | 85.41 | -1.3         | -4273.77 | 18.3                | $2.3 \times 10^{-1}$  | 7090769.7                               | $1.6 \times 10^6$    | 100      |
| 5-OH                                             | 99.41 | 12.7         | -3894.44 | 27.2                | $7.8 \times 10^{-8}$  | 318443.4                                | $2.5 \times 10^{-2}$ | 0        |
| 7-OH                                             | 94.55 | 6.9          | -2521.38 | 21.3                | $1.4 \times 10^{-3}$  | 1794.8                                  | $2.6 \times 10^0$    | 0        |
| 3'-OH                                            | 82.36 | -3.4         | -1883.66 | 16.3                | $7.6 \times 10^0$     | 84.8                                    | $6.4 \times 10^2$    | 0        |
| 4'-OH                                            | 80.35 | -5.8         | -1843.08 | 16.4                | $6.1 \times 10^0$     | 64.8                                    | $4.0 \times 10^2$    | 0        |
|                                                  |       |              |          |                     |                       | $k_{\text{overall}}^{\text{TST/Eck}} =$ | $1.6 \times 10^6$    |          |
| <b><math>\text{CH}_3\text{OO}^\bullet</math></b> |       |              |          |                     |                       |                                         |                      |          |
| 3-OH                                             | 85.41 | 0.9          | -3306.98 | 22.7                | $1.4 \times 10^{-4}$  | 198437.3                                | $2.8 \times 10^1$    | 0.65     |
| 5-OH                                             | 99.41 | 14.9         | -2631.22 | 30.6                | $2.5 \times 10^{-10}$ | 2359.1                                  | $5.8 \times 10^{-7}$ | 0        |
| 7-OH                                             | 94.55 | 10.4         | -2455.59 | 23.3                | $4.9 \times 10^{-5}$  | 281.5                                   | $1.4 \times 10^{-2}$ | 0        |
| 3'-OH                                            | 82.36 | -1.1         | -2226.66 | 16.3                | $7.2 \times 10^0$     | 333.0                                   | $2.4 \times 10^3$    | 55.45    |
| 4'-OH                                            | 80.35 | -3.5         | -2259.20 | 16.5                | $4.7 \times 10^0$     | 411.2                                   | $1.9 \times 10^3$    | 43.90    |
|                                                  |       |              |          |                     |                       | $k_{\text{overall}}^{\text{TST/Eck}} =$ | $4.3 \times 10^3$    |          |

<sup>a</sup> Wigners tunneling corrections remains the same as in Table 1.

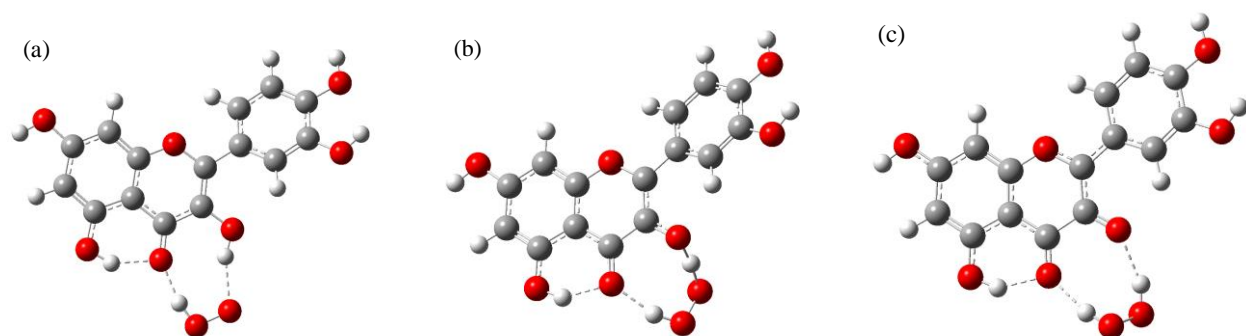

Optimized geometries in pentyl ethanoate obtained with the M05-2X/6-311++G(d,p) method for the reaction of  $\text{HOO}^\bullet$  with 3-OH group of quercetin: (a) reactant complex (RC) – planar structure, (b) transition state (TS), and (c) product complex (PC).

RC, TS and PC are considered in the rate constant and Eckart tunneling estimation using Eyringpy program [a,b].

Only TS imaginary frequency  $\nu(\text{cm}^{-1})$  is considered in Wigner method. Consequently, Wigner tunneling corrections are the same, with or without RC and PC consideration.

[a] Dzib, E.; Cabellos, J.L.; Ortiz-Chi, F.; Pan, S.; Galano, A.; Merino, G. Eyringpy: A program for computing rate constants in the gas phase and in solution. *Int. J. Quantum Chem.* **2019**, *119*, e25686.

[b] Alvarez-Idaboy, J.R.; Mora-Diez, N.; Boyd, R.J.; Vivier-Bunge, A. On the importance of prereactive complexes in mole-cule-radical reactions: Hydrogen abstraction from aldehydes by OH. *J. Am. Chem. Soc.* **2001**, *123*, 2018–2024.

#### Chart S5.

Calculation of molar fractions ( $f$ ) of quercetin species at pH = 7.4

$$\text{p}K_{\text{a}1} = 6.41; \text{p}K_{\text{a}2} = 7.81; \text{p}K_{\text{a}3} = 10.19$$

Acidity data taken from [c]:

[c] R. Alvarez-Diduk, M.T. Ramirez-Silva, A. Galano, A. Merkoci, Deprotonation mechanism and acidity constants in aqueous solution of flavonols: a combined experimental and theoretical study. *J. Phys. Chem. B* **2013**, *117*, 12347–12359.

Calculation of molar fractions was performed according to a study [d]:

[d] A. Galano, J.R. Alvarez-Idaboy, A computational methodology for accurate predictions of rate constants in solution: Application to the assessment of primary antioxidant activity, *J. Comput. Chem.* **2013**, *34*, 2430–2445.

$$f[\text{A}^{3-}] = 1/(1 + \beta_1 [\text{H}^+] + \beta_2 [\text{H}^+]^2 + \beta_3 [\text{H}^+]^3)$$

$$\text{At pH} = 7.4, [\text{H}^+] = 3.98 \times 10^{-8} \text{ M}$$

$$\beta_1 = 10^{\text{p}K_{\text{a}3}} = 10^{10.19}$$

$$\beta_2 = 10^{\text{pKa3} + \text{pKa2}} = 10^{10.19 + 7.81} = 10^{18}$$

$$\beta_3 = 10^{\text{pKa3} + \text{pKa2} + \text{pKa1}} = 10^{10.19 + 7.81 + 6.41} = 10^{24.41}$$

$$\beta_1 [\text{H}^+] = 10^{10.19} \times 3.98 \times 10^{-8} = 616.429$$

$$\beta_2 [\text{H}^+]^2 = 10^{18} \times (3.98 \times 10^{-8})^2 = 1584.04$$

$$\beta_3 [\text{H}^+]^3 = 10^{24.41} \times (3.98 \times 10^{-8})^3 = 162.05$$

$$f[\text{A}^{3-}] = 1/1 + \beta_1 [\text{H}^+] + \beta_2 [\text{H}^+]^2 + \beta_3 [\text{H}^+]^3$$

$$f[\text{A}^{3-}] = 1/(1 + 616.429 + 1584.04 + 162.05) = 1/2363.519 = 4.231 \times 10^{-4}$$

$$f[\text{HA}^{2-}] = \beta_1 [\text{H}^+] \times f[\text{A}^{3-}] = 616.429 \times 4.231 \times 10^{-4} = 0.2608$$

$$f[\text{H}_2\text{A}^-] = \beta_2 [\text{H}^+]^2 \times f[\text{A}^{3-}] = 1584.04 \times 4.231 \times 10^{-4} = 0.6702$$

$$f[\text{H}_3\text{A}] = \beta_3 [\text{H}^+]^3 \times f[\text{A}^{3-}] = 162.05 \times 4.231 \times 10^{-4} = 0.0686$$

## CARTESSIAN COORDINATES

Optimized geometry of quercetin at SMD/rm052x/6-311++g(d,p) level of theory in pentyl ethanoate

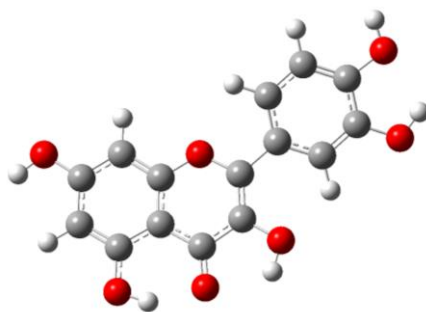

|   |              |              |              |
|---|--------------|--------------|--------------|
| 6 | 2.188172000  | -1.460837000 | -0.447334000 |
| 6 | 1.834972000  | -0.166453000 | -0.057995000 |
| 6 | 2.835942000  | 0.740119000  | 0.312145000  |
| 6 | 4.162101000  | 0.354941000  | 0.285714000  |
| 6 | 4.506878000  | -0.939187000 | -0.113083000 |
| 6 | 3.521830000  | -1.841541000 | -0.478487000 |
| 6 | 0.420447000  | 0.215625000  | -0.034772000 |
| 6 | -0.094345000 | 1.467712000  | -0.115194000 |
| 6 | -1.524286000 | 1.687980000  | -0.107655000 |
| 6 | -2.351278000 | 0.521908000  | -0.020544000 |

|   |              |              |              |
|---|--------------|--------------|--------------|
| 6 | -1.754172000 | -0.740884000 | 0.055841000  |
| 8 | -0.407642000 | -0.863364000 | 0.050422000  |
| 6 | -3.764905000 | 0.604752000  | -0.012203000 |
| 6 | -4.523226000 | -0.544992000 | 0.079899000  |
| 6 | -3.879550000 | -1.784908000 | 0.158984000  |
| 6 | -2.496188000 | -1.905474000 | 0.146709000  |
| 8 | -4.371189000 | 1.794525000  | -0.092693000 |
| 8 | -4.589326000 | -2.929558000 | 0.253035000  |
| 8 | -1.960184000 | 2.853301000  | -0.192510000 |
| 8 | 0.670736000  | 2.576558000  | -0.229029000 |
| 8 | 5.840447000  | -1.217359000 | -0.104843000 |
| 1 | 2.598317000  | 1.743322000  | 0.627887000  |
| 1 | 1.427824000  | -2.170464000 | -0.733981000 |
| 1 | 0.048568000  | 3.318527000  | -0.298809000 |
| 1 | -2.017968000 | -2.870885000 | 0.210112000  |
| 1 | -5.602955000 | -0.474890000 | 0.088180000  |
| 1 | 6.003497000  | -2.123277000 | -0.386843000 |
| 1 | -3.673131000 | 2.481939000  | -0.152259000 |
| 1 | -5.533168000 | -2.736912000 | 0.254407000  |
| 1 | 3.798718000  | -2.841683000 | -0.788049000 |
| 8 | 5.126041000  | 1.238048000  | 0.650489000  |
| 1 | 5.984880000  | 0.804559000  | 0.588229000  |

Optimized geometry of quercetin 3-OH...OOH TS at SMD/um052x/6-311++g(d,p) level of theory in pentyl ethanoate

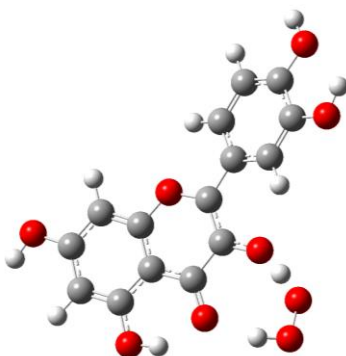

|   |              |              |              |
|---|--------------|--------------|--------------|
| 6 | 2.243124000  | -1.775348000 | 0.502672000  |
| 6 | 1.878895000  | -0.533101000 | -0.038378000 |
| 6 | 2.881309000  | 0.343599000  | -0.486607000 |
| 6 | 4.208327000  | -0.016116000 | -0.384330000 |
| 6 | 4.558777000  | -1.251976000 | 0.171752000  |
| 6 | 3.576407000  | -2.126628000 | 0.612682000  |
| 6 | 0.466411000  | -0.198583000 | -0.122101000 |
| 6 | -0.081499000 | 1.073253000  | -0.275224000 |
| 6 | -1.538481000 | 1.226367000  | -0.285804000 |
| 6 | -2.320828000 | 0.031485000  | -0.176870000 |
| 6 | -1.683495000 | -1.206933000 | -0.044407000 |
| 8 | -0.326797000 | -1.281183000 | -0.030490000 |



|   |              |              |              |
|---|--------------|--------------|--------------|
| 6 | -3.739133000 | 0.050777000  | -0.185434000 |
| 6 | -4.450100000 | -1.129574000 | -0.069537000 |
| 6 | -3.761346000 | -2.336452000 | 0.059746000  |
| 6 | -2.369890000 | -2.396129000 | 0.073550000  |
| 8 | -4.404373000 | 1.200792000  | -0.307184000 |
| 8 | -4.417116000 | -3.506814000 | 0.178454000  |
| 8 | -2.064730000 | 2.357433000  | -0.380912000 |
| 8 | 0.660437000  | 2.134581000  | -0.416781000 |
| 8 | 5.889230000  | -1.504698000 | 0.230175000  |
| 1 | 2.638269000  | 1.296047000  | -0.925871000 |
| 1 | 1.487237000  | -2.459582000 | 0.854740000  |
| 1 | 0.414998000  | 2.893787000  | 0.469416000  |
| 1 | -1.851016000 | -3.337075000 | 0.174562000  |
| 1 | -5.531735000 | -1.100931000 | -0.077465000 |
| 1 | 6.062930000  | -2.375960000 | 0.603114000  |
| 1 | -3.743065000 | 1.922500000  | -0.369685000 |
| 1 | -5.369644000 | -3.361713000 | 0.155141000  |
| 1 | 3.859604000  | -3.079218000 | 1.042350000  |
| 8 | 5.170133000  | 0.827627000  | -0.830669000 |
| 1 | 6.034001000  | 0.421919000  | -0.692534000 |
| 8 | -0.777345000 | 4.472869000  | 0.584317000  |
| 1 | -1.382003000 | 3.839166000  | 0.128623000  |
| 8 | 0.041756000  | 3.651044000  | 1.289007000  |

Optimized geometry of quercetin 5-OH...OOH TS at SMD/um052x/6-311++g(d,p) level of theory in pentyl ethanoate

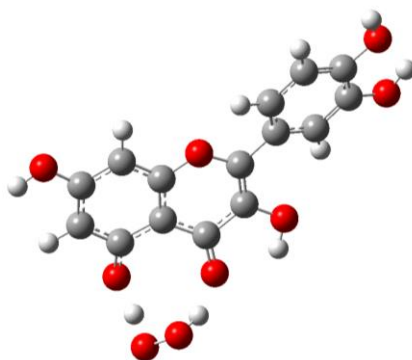

|   |              |              |              |
|---|--------------|--------------|--------------|
| 6 | 2.757390000  | 1.313214000  | 0.682318000  |
| 6 | 2.278138000  | 0.164342000  | 0.047328000  |
| 6 | 3.184263000  | -0.776168000 | -0.459858000 |
| 6 | 4.542656000  | -0.566132000 | -0.327436000 |
| 6 | 5.012979000  | 0.580224000  | 0.319695000  |
| 6 | 4.122258000  | 1.514941000  | 0.821233000  |
| 6 | 0.834819000  | -0.029504000 | -0.086720000 |
| 6 | 0.168263000  | -1.203477000 | -0.246564000 |
| 6 | -1.277442000 | -1.255801000 | -0.274462000 |
| 6 | -1.966812000 | 0.006472000  | -0.281627000 |
| 6 | -1.209531000 | 1.165676000  | -0.095236000 |
| 8 | 0.134287000  | 1.126816000  | 0.015116000  |

|   |              |              |              |
|---|--------------|--------------|--------------|
| 6 | -3.385227000 | 0.166054000  | -0.495153000 |
| 6 | -3.945692000 | 1.452341000  | -0.399477000 |
| 6 | -3.148840000 | 2.563611000  | -0.160685000 |
| 6 | -1.771907000 | 2.436060000  | -0.018558000 |
| 8 | -4.144357000 | -0.813028000 | -0.859933000 |
| 8 | -3.657998000 | 3.809379000  | -0.075616000 |
| 8 | -1.806039000 | -2.386796000 | -0.255387000 |
| 8 | 0.795496000  | -2.394256000 | -0.295724000 |
| 8 | 6.366848000  | 0.687583000  | 0.403188000  |
| 1 | 2.849984000  | -1.666094000 | -0.968754000 |
| 1 | 2.069995000  | 2.045018000  | 1.078113000  |
| 1 | 0.086147000  | -3.058958000 | -0.318010000 |
| 1 | -1.144653000 | 3.300846000  | 0.139594000  |
| 1 | -5.012222000 | 1.549799000  | -0.555530000 |
| 1 | 6.621515000  | 1.505996000  | 0.841794000  |
| 1 | -4.393290000 | -1.747027000 | -0.070861000 |
| 1 | -4.614097000 | 3.789170000  | -0.195410000 |
| 1 | 4.498575000  | 2.398489000  | 1.321288000  |
| 8 | 5.415610000  | -1.473222000 | -0.831908000 |
| 1 | 6.314715000  | -1.167707000 | -0.665188000 |
| 8 | -3.617340000 | -2.364395000 | 1.632270000  |
| 1 | -2.854300000 | -2.542506000 | 1.026127000  |
| 8 | -4.685790000 | -2.391849000 | 0.795248000  |

Optimized geometry of quercetin 7-OH...OOH TS at SMD/um052x/6-311++g(d,p) level of theory in pentyl ethanoate

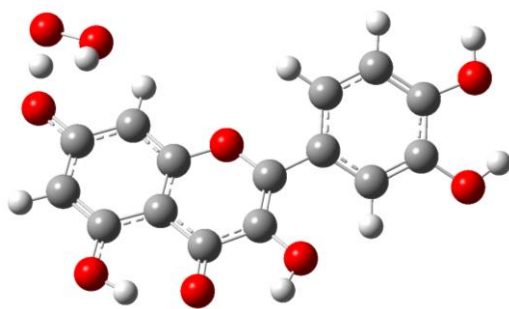

|   |              |              |              |
|---|--------------|--------------|--------------|
| 6 | -2.335683000 | -1.513730000 | 0.134056000  |
| 6 | -2.198864000 | -0.132050000 | -0.025926000 |
| 6 | -3.341086000 | 0.663601000  | -0.183617000 |
| 6 | -4.593329000 | 0.081922000  | -0.175347000 |
| 6 | -4.721322000 | -1.299905000 | -0.005202000 |
| 6 | -3.595661000 | -2.092375000 | 0.149140000  |
| 6 | -0.859800000 | 0.456437000  | -0.034780000 |
| 6 | -0.521029000 | 1.745734000  | 0.246656000  |
| 6 | 0.854579000  | 2.181649000  | 0.224704000  |
| 6 | 1.836053000  | 1.183668000  | -0.099608000 |
| 6 | 1.414608000  | -0.113986000 | -0.371210000 |
| 8 | 0.106930000  | -0.446393000 | -0.337688000 |

|   |              |              |              |
|---|--------------|--------------|--------------|
| 6 | 3.234331000  | 1.488956000  | -0.156237000 |
| 6 | 4.141395000  | 0.509245000  | -0.468562000 |
| 6 | 3.690050000  | -0.799772000 | -0.753423000 |
| 6 | 2.312437000  | -1.120007000 | -0.703595000 |
| 8 | 3.647539000  | 2.732012000  | 0.105867000  |
| 8 | 4.548214000  | -1.733451000 | -1.063642000 |
| 8 | 1.123260000  | 3.367444000  | 0.496285000  |
| 8 | -1.428987000 | 2.682691000  | 0.580772000  |
| 8 | -5.997397000 | -1.770475000 | -0.008708000 |
| 1 | -3.271717000 | 1.730483000  | -0.322547000 |
| 1 | -1.464837000 | -2.138987000 | 0.256056000  |
| 1 | -0.925139000 | 3.496071000  | 0.748492000  |
| 1 | 1.969773000  | -2.113779000 | -0.946210000 |
| 1 | 5.198466000  | 0.727236000  | -0.508958000 |
| 1 | -6.013760000 | -2.725486000 | 0.114095000  |
| 1 | 2.860855000  | 3.281706000  | 0.309673000  |
| 1 | 4.503321000  | -2.586906000 | -0.278583000 |
| 1 | -3.706552000 | -3.161423000 | 0.282244000  |
| 8 | -5.695248000 | 0.856141000  | -0.336089000 |
| 1 | -6.479127000 | 0.295409000  | -0.303508000 |
| 8 | 4.400807000  | -3.232618000 | 0.743873000  |
| 8 | 3.273533000  | -2.717254000 | 1.314229000  |
| 1 | 3.599442000  | -2.145421000 | 2.027751000  |

Optimized geometry of quercetin 3'-OH...\*OOH TS at SMD/um052x/6-311++g(d,p) level of theory in pentyl ethanoate

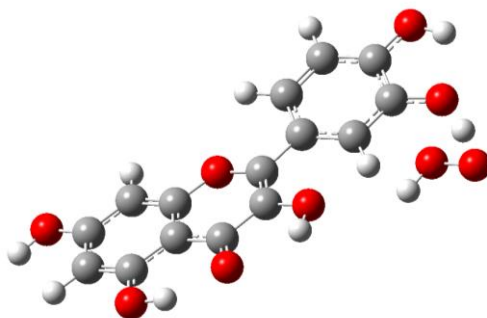

|   |              |              |              |
|---|--------------|--------------|--------------|
| 6 | -1.610222000 | 1.639031000  | -0.676995000 |
| 6 | -1.325343000 | 0.273259000  | -0.447514000 |
| 6 | -2.378610000 | -0.625255000 | -0.343259000 |
| 6 | -3.700602000 | -0.175717000 | -0.466978000 |
| 6 | -3.961273000 | 1.197799000  | -0.707066000 |
| 6 | -2.904948000 | 2.096179000  | -0.809751000 |
| 6 | 0.070927000  | -0.151962000 | -0.320393000 |
| 6 | 0.557677000  | -1.414464000 | -0.407219000 |
| 6 | 1.976857000  | -1.678314000 | -0.271960000 |
| 6 | 2.819457000  | -0.544728000 | -0.043531000 |
| 6 | 2.251867000  | 0.732898000  | 0.024337000  |
| 8 | 0.915522000  | 0.896746000  | -0.111156000 |

|   |              |              |              |
|---|--------------|--------------|--------------|
| 6 | 4.221595000  | -0.672545000 | 0.111549000  |
| 6 | 4.996641000  | 0.448965000  | 0.327199000  |
| 6 | 4.382791000  | 1.704978000  | 0.383825000  |
| 6 | 3.011231000  | 1.869234000  | 0.235778000  |
| 8 | 4.801202000  | -1.876160000 | 0.051140000  |
| 8 | 5.109724000  | 2.822990000  | 0.588295000  |
| 8 | 2.382983000  | -2.852225000 | -0.366007000 |
| 8 | -0.219534000 | -2.495339000 | -0.629048000 |
| 8 | -5.221789000 | 1.611818000  | -0.836795000 |
| 1 | -2.217868000 | -1.677394000 | -0.168019000 |
| 1 | -0.797472000 | 2.344529000  | -0.757597000 |
| 1 | 0.386690000  | -3.253636000 | -0.667076000 |
| 1 | 2.557118000  | 2.847038000  | 0.287517000  |
| 1 | 6.067006000  | 0.344510000  | 0.446472000  |
| 1 | -5.800237000 | 0.837900000  | -0.758513000 |
| 1 | 4.099989000  | -2.541201000 | -0.114188000 |
| 1 | 6.042683000  | 2.602136000  | 0.682255000  |
| 1 | -3.112452000 | 3.140943000  | -0.992148000 |
| 8 | -4.741889000 | -0.991253000 | -0.388924000 |
| 1 | -4.960002000 | -1.176134000 | 0.679190000  |
| 8 | -4.214925000 | 0.029586000  | 2.166468000  |
| 1 | -3.320905000 | -0.311519000 | 2.334580000  |
| 8 | -4.985395000 | -1.065328000 | 1.963454000  |

Optimized geometry of quercetin 4'-OH...•OOH TS at SMD/um052x/6-311++g(d,p) level of theory in pentyl ethanoate

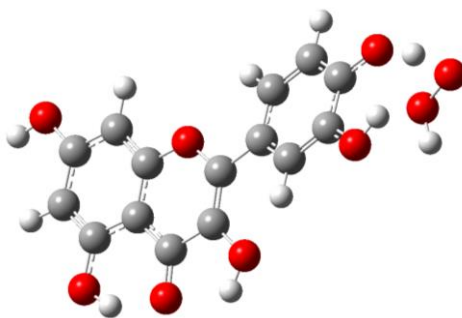

|   |              |              |              |
|---|--------------|--------------|--------------|
| 6 | -1.668547000 | 1.377901000  | -0.114852000 |
| 6 | -1.253814000 | 0.046217000  | -0.337716000 |
| 6 | -2.186186000 | -0.927477000 | -0.700852000 |
| 6 | -3.518450000 | -0.575013000 | -0.829430000 |
| 6 | -3.945038000 | 0.753701000  | -0.586042000 |
| 6 | -2.993068000 | 1.722550000  | -0.231713000 |
| 6 | 0.164176000  | -0.283997000 | -0.195520000 |
| 6 | 0.706845000  | -1.513461000 | -0.006654000 |
| 6 | 2.142385000  | -1.681026000 | 0.146422000  |
| 6 | 2.934296000  | -0.492503000 | 0.088007000  |
| 6 | 2.307065000  | 0.744269000  | -0.107848000 |
| 8 | 0.963601000  | 0.819158000  | -0.241242000 |

|   |              |              |              |
|---|--------------|--------------|--------------|
| 6 | 4.345262000  | -0.523465000 | 0.218452000  |
| 6 | 5.070172000  | 0.648538000  | 0.151155000  |
| 6 | 4.396765000  | 1.859704000  | -0.044106000 |
| 6 | 3.015564000  | 1.929506000  | -0.176324000 |
| 8 | 4.981958000  | -1.684636000 | 0.404678000  |
| 8 | 5.072307000  | 3.024527000  | -0.113762000 |
| 8 | 2.595081000  | -2.826711000 | 0.326291000  |
| 8 | -0.019244000 | -2.644467000 | 0.071305000  |
| 8 | -5.233777000 | 1.019371000  | -0.743522000 |
| 1 | -1.895794000 | -1.946380000 | -0.897238000 |
| 1 | -0.943460000 | 2.126570000  | 0.162442000  |
| 1 | 0.620920000  | -3.359224000 | 0.227570000  |
| 1 | 2.515186000  | 2.873523000  | -0.329007000 |
| 1 | 6.147385000  | 0.618123000  | 0.249369000  |
| 1 | -5.717348000 | 1.024621000  | 0.239595000  |
| 1 | 4.311271000  | -2.398280000 | 0.427931000  |
| 1 | 6.017779000  | 2.869040000  | -0.012796000 |
| 1 | -3.329036000 | 2.733920000  | -0.048216000 |
| 8 | -4.429364000 | -1.496005000 | -1.185339000 |
| 1 | -5.276292000 | -1.041062000 | -1.303517000 |
| 8 | -4.778839000 | 0.373909000  | 1.951643000  |
| 1 | -4.809545000 | -0.595122000 | 2.017381000  |
| 8 | -5.994927000 | 0.737555000  | 1.483526000  |

Optimized geometry of quercetin 3-OH...<sup>+</sup>OOCH<sub>3</sub> TS at SMD/um052x/6-311++g(d,p) level of theory in pentyl ethanoate

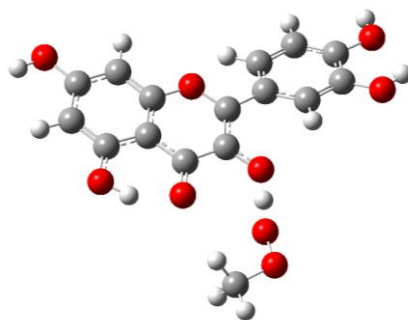

|   |              |              |              |
|---|--------------|--------------|--------------|
| 6 | 2.134749000  | -1.964288000 | 0.676594000  |
| 6 | 1.800475000  | -0.817591000 | -0.056466000 |
| 6 | 2.817360000  | -0.065230000 | -0.664929000 |
| 6 | 4.134315000  | -0.452282000 | -0.532480000 |
| 6 | 4.457544000  | -1.590605000 | 0.215491000  |
| 6 | 3.459341000  | -2.341313000 | 0.817825000  |
| 6 | 0.395039000  | -0.452005000 | -0.180512000 |
| 6 | -0.109056000 | 0.808139000  | -0.467505000 |
| 6 | -1.561467000 | 1.013115000  | -0.523197000 |
| 6 | -2.378364000 | -0.147027000 | -0.271413000 |
| 6 | -1.783188000 | -1.379933000 | 0.002685000  |
| 8 | -0.427169000 | -1.498513000 | 0.028358000  |
| 6 | -3.792181000 | -0.080342000 | -0.294312000 |
| 6 | -4.546105000 | -1.215477000 | -0.051685000 |

|   |              |              |              |
|---|--------------|--------------|--------------|
| 6 | -3.899010000 | -2.421864000 | 0.218136000  |
| 6 | -2.510663000 | -2.525735000 | 0.249489000  |
| 8 | -4.408253000 | 1.076030000  | -0.549316000 |
| 8 | -4.596214000 | -3.550890000 | 0.461983000  |
| 8 | -2.041595000 | 2.131011000  | -0.755534000 |
| 8 | 0.676162000  | 1.829769000  | -0.688821000 |
| 8 | 5.781471000  | -1.881123000 | 0.286696000  |
| 1 | 2.591780000  | 0.810771000  | -1.250403000 |
| 1 | 1.363431000  | -2.551548000 | 1.150198000  |
| 1 | 0.764960000  | 2.546046000  | 0.213379000  |
| 1 | -2.023285000 | -3.466473000 | 0.455295000  |
| 1 | -5.626114000 | -1.152043000 | -0.072579000 |
| 1 | -3.706967000 | 1.753053000  | -0.693292000 |
| 1 | -5.542288000 | -3.376582000 | 0.408435000  |
| 8 | 0.832809000  | 3.266131000  | 1.182467000  |
| 8 | 0.640867000  | 4.524534000  | 0.730770000  |
| 6 | -0.748764000 | 4.853827000  | 0.799037000  |
| 1 | -0.824943000 | 5.870395000  | 0.421134000  |
| 1 | -1.084330000 | 4.800192000  | 1.834234000  |
| 1 | -1.310201000 | 4.158783000  | 0.174101000  |
| 1 | 3.721961000  | -3.218843000 | 1.395636000  |
| 1 | 5.933739000  | -2.679456000 | 0.803614000  |
| 8 | 5.111639000  | 0.267862000  | -1.135549000 |
| 1 | 5.964374000  | -0.141122000 | -0.948751000 |

Optimized geometry of quercetin 5-OH...<sup>•</sup>OOCH<sub>3</sub> TS at SMD/um052x/6-311++g(d,p) level of theory in pentyl ethanoate

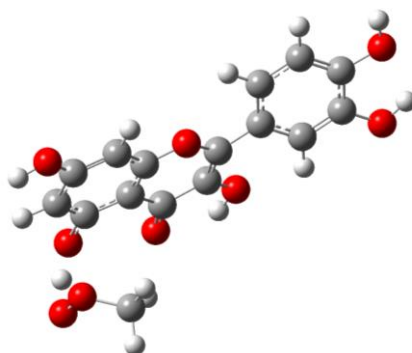

|   |              |              |              |
|---|--------------|--------------|--------------|
| 6 | 3.004532000  | 1.466710000  | -0.234478000 |
| 6 | 2.533221000  | 0.158383000  | -0.100554000 |
| 6 | 3.429776000  | -0.868405000 | 0.220620000  |
| 6 | 4.770653000  | -0.585705000 | 0.396096000  |
| 6 | 5.234709000  | 0.724412000  | 0.251429000  |
| 6 | 4.353410000  | 1.744953000  | -0.062790000 |
| 6 | 1.106030000  | -0.114275000 | -0.290037000 |
| 6 | 0.517875000  | -1.290078000 | -0.607534000 |
| 6 | -0.928214000 | -1.417645000 | -0.808941000 |
| 6 | -1.685574000 | -0.190135000 | -0.643794000 |
| 6 | -1.000374000 | 0.972759000  | -0.302676000 |
| 8 | 0.335004000  | 1.001560000  | -0.139859000 |
| 6 | -3.108228000 | -0.089341000 | -0.804845000 |

|   |              |              |              |
|---|--------------|--------------|--------------|
| 6 | -3.742776000 | 1.150219000  | -0.596879000 |
| 6 | -3.007157000 | 2.278456000  | -0.231511000 |
| 6 | -1.636616000 | 2.202572000  | -0.086772000 |
| 8 | -3.825944000 | -1.119608000 | -1.133553000 |
| 8 | -3.594572000 | 3.474765000  | -0.012242000 |
| 8 | -1.358646000 | -2.529227000 | -1.103200000 |
| 8 | 1.207811000  | -2.431900000 | -0.788577000 |
| 8 | 6.573215000  | 0.893337000  | 0.442873000  |
| 1 | 3.099014000  | -1.887490000 | 0.341377000  |
| 1 | 2.326144000  | 2.268684000  | -0.481353000 |
| 1 | 0.531820000  | -3.090255000 | -1.031801000 |
| 1 | -1.054626000 | 3.071166000  | 0.185110000  |
| 1 | -4.815447000 | 1.201081000  | -0.731881000 |
| 1 | 6.823687000  | 1.815350000  | 0.325368000  |
| 1 | -4.576403000 | -1.357545000 | -0.255218000 |
| 1 | -4.548766000 | 3.404606000  | -0.126354000 |
| 1 | 4.722833000  | 2.757009000  | -0.173090000 |
| 8 | 5.632955000  | -1.584280000 | 0.713928000  |
| 1 | 6.519655000  | -1.214482000 | 0.795598000  |
| 8 | -4.523995000 | -0.487458000 | 1.540422000  |
| 8 | -5.111579000 | -1.467441000 | 0.810862000  |
| 6 | -3.497288000 | -1.050743000 | 2.368916000  |
| 1 | -2.843533000 | -1.677568000 | 1.765244000  |
| 1 | -2.959226000 | -0.202569000 | 2.785429000  |
| 1 | -3.963023000 | -1.638793000 | 3.158830000  |

Optimized geometry of quercetin 7-OH...<sup>+</sup>OOCH<sub>3</sub> TS at SMD/um052x/6-311++g(d,p) level of theory in pentyl ethanoate

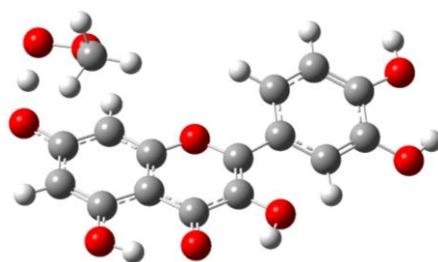

|   |              |              |              |
|---|--------------|--------------|--------------|
| 6 | -2.437602000 | -1.501823000 | -0.053118000 |
| 6 | -2.333163000 | -0.108113000 | -0.076757000 |
| 6 | -3.496842000 | 0.672098000  | -0.102129000 |
| 6 | -4.736390000 | 0.063859000  | -0.097836000 |
| 6 | -4.831407000 | -1.330533000 | -0.062362000 |
| 6 | -3.684884000 | -2.107800000 | -0.040885000 |
| 6 | -1.006519000 | 0.508620000  | -0.089719000 |
| 6 | -0.678860000 | 1.781380000  | 0.268449000  |
| 6 | 0.687141000  | 2.246853000  | 0.217201000  |
| 6 | 1.670820000  | 1.294165000  | -0.212509000 |
| 6 | 1.263669000  | 0.009063000  | -0.549447000 |
| 8 | -0.034907000 | -0.350988000 | -0.489957000 |
| 6 | 3.061659000  | 1.632310000  | -0.312033000 |
| 6 | 3.975017000  | 0.691666000  | -0.709575000 |
| 6 | 3.543291000  | -0.615992000 | -1.033948000 |

|   |              |              |              |
|---|--------------|--------------|--------------|
| 6 | 2.169688000  | -0.959242000 | -0.970891000 |
| 8 | 3.456951000  | 2.868688000  | 0.002138000  |
| 8 | 4.406900000  | -1.534292000 | -1.354361000 |
| 8 | 0.944378000  | 3.419335000  | 0.552870000  |
| 8 | -1.586802000 | 2.676494000  | 0.702735000  |
| 8 | -6.098001000 | -1.827205000 | -0.055325000 |
| 1 | -3.454910000 | 1.748746000  | -0.135974000 |
| 1 | -1.550363000 | -2.116068000 | -0.037743000 |
| 1 | -1.089973000 | 3.488488000  | 0.896800000  |
| 1 | 1.835941000  | -1.939909000 | -1.271082000 |
| 1 | 5.026636000  | 0.931940000  | -0.765034000 |
| 1 | -6.090974000 | -2.790123000 | -0.047413000 |
| 1 | 2.667646000  | 3.384817000  | 0.274207000  |
| 1 | 4.334262000  | -2.413733000 | -0.538543000 |
| 1 | -3.768747000 | -3.187159000 | -0.014726000 |
| 8 | -5.857608000 | 0.825791000  | -0.132162000 |
| 1 | -6.629148000 | 0.247557000  | -0.147280000 |
| 8 | 4.177029000  | -3.053108000 | 0.442245000  |
| 8 | 3.030479000  | -2.536287000 | 0.959972000  |
| 6 | 3.337893000  | -1.721488000 | 2.099834000  |
| 1 | 4.055327000  | -0.951887000 | 1.820914000  |
| 1 | 2.391862000  | -1.283653000 | 2.409376000  |
| 1 | 3.744018000  | -2.356580000 | 2.885603000  |

Optimized geometry of quercetin 3'-OH...OCH<sub>3</sub> TS at SMD/um052x/6-311++g(d,p) level of theory in pentyl ethanoate

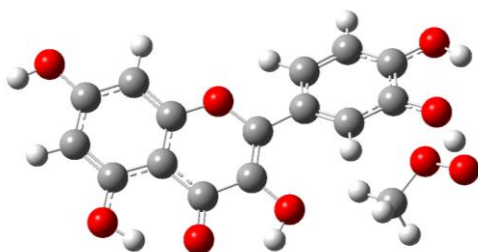

|   |              |              |              |
|---|--------------|--------------|--------------|
| 6 | -1.373233000 | 1.808009000  | 0.378374000  |
| 6 | -1.096128000 | 0.576006000  | -0.258932000 |
| 6 | -2.121077000 | -0.111498000 | -0.886086000 |
| 6 | -3.423659000 | 0.406280000  | -0.879313000 |
| 6 | -3.679266000 | 1.646328000  | -0.233317000 |
| 6 | -2.646043000 | 2.336645000  | 0.394974000  |
| 6 | 0.269882000  | 0.050088000  | -0.231886000 |
| 6 | 0.634495000  | -1.253225000 | -0.291237000 |
| 6 | 2.028251000  | -1.640819000 | -0.211723000 |
| 6 | 2.977885000  | -0.578410000 | -0.072148000 |
| 6 | 2.529505000  | 0.746905000  | -0.017295000 |
| 8 | 1.207746000  | 1.028349000  | -0.098669000 |
| 6 | 4.369388000  | -0.826165000 | 0.023407000  |



|   |              |              |              |
|---|--------------|--------------|--------------|
| 6 | 5.250786000  | 0.227399000  | 0.159724000  |
| 6 | 4.754003000  | 1.534581000  | 0.200912000  |
| 6 | 3.396285000  | 1.816176000  | 0.116289000  |
| 8 | 4.837678000  | -2.078379000 | -0.018006000 |
| 8 | 5.586312000  | 2.588782000  | 0.326788000  |
| 8 | 2.321926000  | -2.850843000 | -0.251589000 |
| 8 | -0.255337000 | -2.264157000 | -0.394796000 |
| 8 | -4.917006000 | 2.139464000  | -0.237178000 |
| 1 | -1.950907000 | -1.047362000 | -1.395410000 |
| 1 | -0.573341000 | 2.342675000  | 0.869230000  |
| 1 | 0.272056000  | -3.079908000 | -0.386724000 |
| 1 | 3.032102000  | 2.831488000  | 0.151572000  |
| 1 | 6.312449000  | 0.032002000  | 0.233220000  |
| 1 | -5.477349000 | 1.539595000  | -0.752503000 |
| 1 | 4.072924000  | -2.684398000 | -0.111502000 |
| 1 | 6.499665000  | 2.287829000  | 0.384550000  |
| 1 | -2.856709000 | 3.274199000  | 0.889410000  |
| 8 | -4.431556000 | -0.199526000 | -1.480404000 |
| 1 | -4.982243000 | -0.815991000 | -0.700024000 |
| 8 | -4.522031000 | -0.724245000 | 1.256732000  |
| 8 | -5.369905000 | -1.313294000 | 0.381929000  |
| 6 | -3.548221000 | -1.674990000 | 1.714802000  |
| 1 | -3.076697000 | -2.162531000 | 0.864482000  |
| 1 | -2.824528000 | -1.100189000 | 2.287244000  |
| 1 | -4.047161000 | -2.406478000 | 2.348703000  |

Optimized geometry of quercetin 4'-OH...<sup>+</sup>OOCH<sub>3</sub> TS at SMD/um052x/6-311++g(d,p) level of theory in pentyl ethanoate

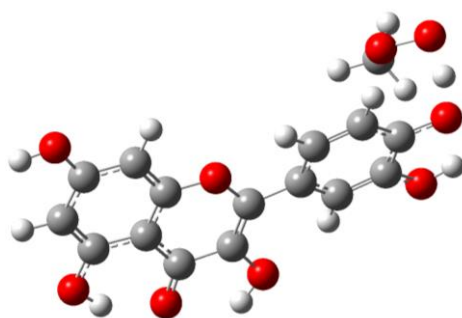

|   |              |              |              |
|---|--------------|--------------|--------------|
| 6 | 1.470410000  | -0.998122000 | -1.051549000 |
| 6 | 1.042796000  | 0.244584000  | -0.529776000 |
| 6 | 1.978636000  | 1.243004000  | -0.245591000 |
| 6 | 3.319921000  | 0.998993000  | -0.478366000 |
| 6 | 3.758594000  | -0.245792000 | -0.998291000 |
| 6 | 2.801622000  | -1.234670000 | -1.287756000 |
| 6 | -0.384496000 | 0.454474000  | -0.292424000 |
| 6 | -1.023608000 | 1.635305000  | -0.087502000 |
| 6 | -2.461903000 | 1.681918000  | 0.114903000  |
| 6 | -3.152826000 | 0.431576000  | 0.088628000  |
| 6 | -2.431801000 | -0.748899000 | -0.130487000 |
| 8 | -1.093210000 | -0.710406000 | -0.314684000 |
| 6 | -4.554254000 | 0.344977000  | 0.278762000  |

|   |              |              |              |
|---|--------------|--------------|--------------|
| 6 | -5.178990000 | -0.885062000 | 0.253109000  |
| 6 | -4.414842000 | -2.036432000 | 0.032782000  |
| 6 | -3.039945000 | -1.990259000 | -0.162749000 |
| 8 | -5.278737000 | 1.449708000  | 0.485855000  |
| 8 | -4.991224000 | -3.255160000 | 0.000960000  |
| 8 | -3.004901000 | 2.788611000  | 0.290671000  |
| 8 | -0.400570000 | 2.828280000  | -0.068519000 |
| 8 | 5.051984000  | -0.395330000 | -1.205618000 |
| 1 | 1.686566000  | 2.197936000  | 0.157783000  |
| 1 | 0.744618000  | -1.765100000 | -1.270384000 |
| 1 | -1.099305000 | 3.488521000  | 0.077549000  |
| 1 | -2.470021000 | -2.891245000 | -0.331261000 |
| 1 | -6.248991000 | -0.944122000 | 0.401965000  |
| 1 | 5.455391000  | -1.073703000 | -0.394406000 |
| 1 | -4.671742000 | 2.218549000  | 0.468313000  |
| 1 | -5.940380000 | -3.179540000 | 0.148176000  |
| 1 | 3.142393000  | -2.180446000 | -1.686552000 |
| 8 | 4.239215000  | 1.938530000  | -0.202396000 |
| 1 | 5.097799000  | 1.594872000  | -0.493057000 |
| 8 | 4.437402000  | -1.437297000 | 1.312270000  |
| 8 | 5.630022000  | -1.642878000 | 0.712254000  |
| 6 | 4.571873000  | -0.449374000 | 2.341336000  |
| 1 | 3.569735000  | -0.300809000 | 2.735360000  |
| 1 | 5.241450000  | -0.828635000 | 3.111720000  |
| 1 | 4.965512000  | 0.473931000  | 1.918280000  |

Optimized geometry of rooperol at SMD/rm052x/6-311++g(d,p) level of theory in pentyl ethanoate

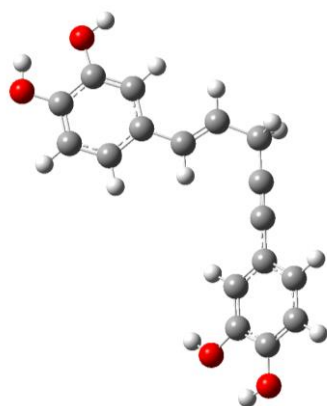

|   |              |              |              |
|---|--------------|--------------|--------------|
| 8 | -4.460263000 | -2.538429000 | 0.835829000  |
| 8 | -6.647015000 | -1.498265000 | -0.271774000 |
| 6 | 0.173225000  | 3.104965000  | 0.231430000  |
| 6 | -3.224357000 | 0.829378000  | -0.024403000 |
| 6 | -3.220858000 | -0.481786000 | 0.470387000  |
| 6 | -4.363825000 | -1.252045000 | 0.383990000  |
| 6 | -4.388570000 | 1.341316000  | -0.600256000 |
| 6 | -5.528491000 | -0.736160000 | -0.192495000 |
| 6 | -5.533185000 | 0.559594000  | -0.682500000 |
| 6 | -1.039390000 | 2.296299000  | 0.137779000  |
| 6 | -2.038880000 | 1.628125000  | 0.062071000  |

|   |              |              |              |
|---|--------------|--------------|--------------|
| 1 | -3.637266000 | -2.817698000 | 1.249107000  |
| 1 | -6.462877000 | -2.359529000 | 0.120955000  |
| 1 | 0.167457000  | 3.847318000  | -0.571891000 |
| 1 | 0.150346000  | 3.674921000  | 1.164774000  |
| 1 | -2.324197000 | -0.891139000 | 0.918832000  |
| 1 | -4.394689000 | 2.351553000  | -0.983331000 |
| 1 | -6.440930000 | 0.945817000  | -1.125170000 |
| 6 | 1.461229000  | 2.323573000  | 0.168767000  |
| 6 | 1.551942000  | 1.004053000  | 0.013458000  |
| 1 | 2.351202000  | 2.936238000  | 0.257615000  |
| 1 | 0.635233000  | 0.431879000  | -0.087481000 |
| 6 | 2.785791000  | 0.204946000  | -0.050418000 |
| 6 | 2.684779000  | -1.155611000 | -0.340607000 |
| 6 | 4.061219000  | 0.744149000  | 0.167333000  |
| 6 | 3.813975000  | -1.963771000 | -0.426019000 |
| 1 | 1.707650000  | -1.589267000 | -0.508795000 |
| 6 | 5.180987000  | -0.058099000 | 0.081718000  |
| 1 | 4.191145000  | 1.791557000  | 0.410228000  |
| 6 | 5.068040000  | -1.420614000 | -0.216739000 |
| 1 | 3.731699000  | -3.017481000 | -0.655046000 |
| 8 | 6.177991000  | -2.198911000 | -0.296004000 |
| 1 | 6.952286000  | -1.647962000 | -0.133990000 |
| 8 | 6.459671000  | 0.385848000  | 0.280450000  |
| 1 | 6.468087000  | 1.331987000  | 0.455213000  |

Optimized geometry of rooperol 3'-OH...OOH TS at SMD/um052x/6-311++g(d,p) level of theory in pentyl ethanoate

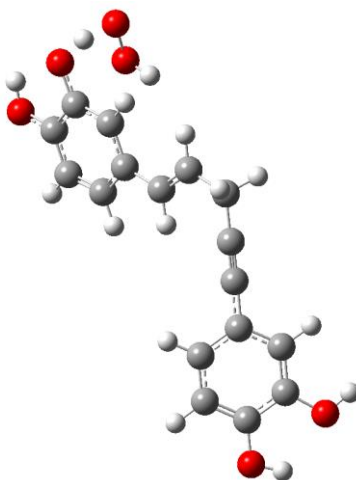

|   |              |              |              |
|---|--------------|--------------|--------------|
| 8 | -6.997248000 | 0.406262000  | 1.481573000  |
| 8 | -7.137363000 | -1.895195000 | 0.155492000  |
| 6 | -0.427341000 | 2.802701000  | -0.754720000 |
| 6 | -3.767358000 | 0.475089000  | -0.299557000 |
| 6 | -4.808483000 | 0.887731000  | 0.542940000  |
| 6 | -5.928759000 | 0.093651000  | 0.689040000  |
| 6 | -3.876886000 | -0.738163000 | -0.982044000 |
| 6 | -6.034607000 | -1.121783000 | 0.005565000  |
| 6 | -5.005842000 | -1.531373000 | -0.826730000 |
| 6 | -1.622706000 | 1.980386000  | -0.588877000 |

|   |              |              |              |
|---|--------------|--------------|--------------|
| 6 | -2.604139000 | 1.295169000  | -0.455097000 |
| 1 | -6.851575000 | 1.239944000  | 1.939848000  |
| 1 | -7.742893000 | -1.457166000 | 0.764952000  |
| 1 | -0.474251000 | 3.314893000  | -1.720214000 |
| 1 | -0.429875000 | 3.592981000  | 0.001440000  |
| 1 | -4.734601000 | 1.826430000  | 1.077480000  |
| 1 | -3.076950000 | -1.057182000 | -1.634776000 |
| 1 | -5.102034000 | -2.473132000 | -1.349341000 |
| 6 | 0.874535000  | 2.049868000  | -0.669267000 |
| 6 | 0.989257000  | 0.740621000  | -0.451645000 |
| 1 | 1.752835000  | 2.671207000  | -0.802586000 |
| 1 | 0.085827000  | 0.156906000  | -0.309799000 |
| 6 | 2.243662000  | -0.021637000 | -0.366411000 |
| 6 | 2.169150000  | -1.377402000 | 0.024820000  |
| 6 | 3.492150000  | 0.511223000  | -0.652273000 |
| 6 | 3.290849000  | -2.175197000 | 0.143472000  |
| 1 | 1.196695000  | -1.800420000 | 0.241269000  |
| 6 | 4.644773000  | -0.273732000 | -0.532000000 |
| 1 | 3.617666000  | 1.534052000  | -0.981757000 |
| 6 | 4.539950000  | -1.631025000 | -0.131874000 |
| 1 | 3.216310000  | -3.210031000 | 0.446505000  |
| 8 | 5.647414000  | -2.373413000 | -0.033824000 |
| 1 | 6.398271000  | -1.816606000 | -0.289005000 |
| 8 | 5.862660000  | 0.189745000  | -0.797437000 |
| 1 | 6.192076000  | 0.767443000  | 0.064085000  |
| 8 | 6.282364000  | 1.227085000  | 1.299924000  |
| 8 | 5.391406000  | 0.443829000  | 1.951471000  |
| 1 | 4.549393000  | 0.927415000  | 1.922260000  |

Optimized geometry of rooperol 4'-OH...\*OOH TS at SMD/um052x/6-311++g(d,p) level of theory in pentyl ethanoate

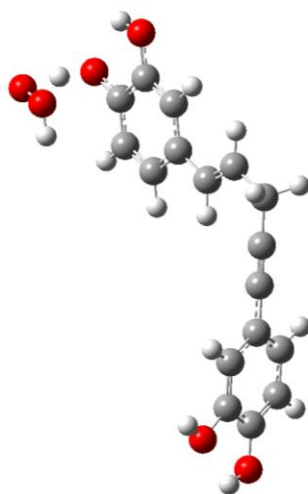

|   |             |              |              |
|---|-------------|--------------|--------------|
| 8 | 6.235555000 | -1.456812000 | 1.740547000  |
| 8 | 7.024020000 | -1.882569000 | -0.764627000 |
| 6 | 0.643140000 | 3.146281000  | 0.619586000  |
| 6 | 3.817998000 | 0.653650000  | -0.078349000 |
| 6 | 4.469348000 | 0.036212000  | 0.998254000  |
| 6 | 5.536069000 | -0.808188000 | 0.762274000  |
| 6 | 4.257274000 | 0.404965000  | -1.379992000 |
| 6 | 5.974817000 | -1.054079000 | -0.542531000 |
| 6 | 5.330793000 | -0.445961000 | -1.607612000 |
| 6 | 1.778397000 | 2.263014000  | 0.369102000  |

|   |              |              |              |
|---|--------------|--------------|--------------|
| 6 | 2.711443000  | 1.529295000  | 0.164570000  |
| 1 | 5.888165000  | -1.239342000 | 2.611252000  |
| 1 | 7.348140000  | -2.206523000 | 0.084088000  |
| 1 | 0.690104000  | 3.505611000  | 1.651481000  |
| 1 | 0.733366000  | 4.037450000  | -0.008512000 |
| 1 | 4.138619000  | 0.221241000  | 2.012433000  |
| 1 | 3.757714000  | 0.879989000  | -2.212204000 |
| 1 | 5.680430000  | -0.645759000 | -2.611070000 |
| 6 | -0.708100000 | 2.526537000  | 0.385885000  |
| 6 | -0.916691000 | 1.279700000  | -0.040014000 |
| 1 | -1.539707000 | 3.189998000  | 0.591918000  |
| 1 | -0.058330000 | 0.648739000  | -0.243207000 |
| 6 | -2.221180000 | 0.655185000  | -0.276712000 |
| 6 | -2.235223000 | -0.665248000 | -0.771474000 |
| 6 | -3.433764000 | 1.307894000  | -0.036021000 |
| 6 | -3.423565000 | -1.316540000 | -1.022938000 |
| 1 | -1.294665000 | -1.165078000 | -0.960693000 |
| 6 | -4.629396000 | 0.659135000  | -0.279403000 |
| 1 | -3.469675000 | 2.318449000  | 0.344770000  |
| 6 | -4.642091000 | -0.668420000 | -0.775599000 |
| 1 | -3.444743000 | -2.325510000 | -1.413976000 |
| 8 | -5.826567000 | -1.229724000 | -1.010820000 |
| 1 | -6.036902000 | -1.921209000 | -0.217116000 |
| 8 | -5.797829000 | 1.280325000  | -0.052046000 |
| 1 | -6.507258000 | 0.674525000  | -0.309816000 |
| 8 | -5.084677000 | -1.777433000 | 1.637777000  |
| 1 | -4.223437000 | -2.196664000 | 1.473149000  |
| 8 | -5.990182000 | -2.533352000 | 0.983338000  |

Optimized geometry of rooperol 3''-OH...\*OOH TS at SMD/um052x/6-311++g(d,p) level of theory in pentyl ethanoate

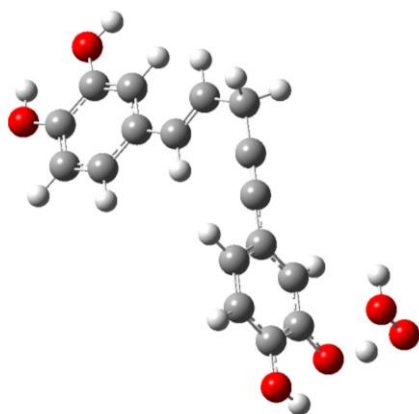

|   |              |              |              |
|---|--------------|--------------|--------------|
| 8 | 4.850872000  | -1.157768000 | -1.673905000 |
| 8 | 5.727763000  | -2.137242000 | 0.664456000  |
| 6 | -0.797660000 | 2.874300000  | 0.589401000  |
| 6 | 2.458951000  | 0.392926000  | 0.596623000  |
| 6 | 3.093807000  | 0.057268000  | -0.589525000 |
| 6 | 4.207344000  | -0.793967000 | -0.573052000 |
| 6 | 2.942187000  | -0.137174000 | 1.815008000  |
| 6 | 4.673195000  | -1.318516000 | 0.660429000  |
| 6 | 4.031160000  | -0.984167000 | 1.848906000  |
| 6 | 0.368696000  | 1.996848000  | 0.595901000  |
| 6 | 1.323073000  | 1.261940000  | 0.595260000  |
| 1 | 5.522256000  | -0.336201000 | -1.961993000 |

|   |              |              |              |
|---|--------------|--------------|--------------|
| 1 | 6.008040000  | -2.264583000 | -0.254418000 |
| 1 | -0.824412000 | 3.435260000  | 1.527595000  |
| 1 | -0.674619000 | 3.618787000  | -0.202171000 |
| 1 | 2.744022000  | 0.437541000  | -1.540000000 |
| 1 | 2.439494000  | 0.128274000  | 2.734304000  |
| 1 | 4.397879000  | -1.389013000 | 2.781521000  |
| 6 | -2.117197000 | 2.168457000  | 0.399736000  |
| 6 | -2.274814000 | 0.852632000  | 0.268867000  |
| 1 | -2.973121000 | 2.833878000  | 0.387528000  |
| 1 | -1.397195000 | 0.215830000  | 0.314332000  |
| 6 | -3.549207000 | 0.139284000  | 0.086254000  |
| 6 | -3.573022000 | -1.245160000 | 0.255899000  |
| 6 | -4.743794000 | 0.789446000  | -0.251997000 |
| 6 | -4.751958000 | -1.969737000 | 0.114491000  |
| 1 | -2.657013000 | -1.763711000 | 0.507372000  |
| 6 | -5.912599000 | 0.068590000  | -0.395093000 |
| 1 | -4.766314000 | 1.858792000  | -0.422991000 |
| 6 | -5.927977000 | -1.317927000 | -0.209493000 |
| 1 | -4.769354000 | -3.042467000 | 0.250928000  |
| 8 | -7.083646000 | -2.015395000 | -0.357205000 |
| 1 | -7.786420000 | -1.398369000 | -0.591086000 |
| 8 | -7.119383000 | 0.619547000  | -0.730359000 |
| 1 | -7.035036000 | 1.568811000  | -0.862991000 |
| 8 | 6.089284000  | 1.116781000  | -0.612104000 |
| 1 | 5.350026000  | 1.747082000  | -0.615811000 |
| 8 | 6.250192000  | 0.741555000  | -1.903108000 |

Optimized geometry of rooperol 4''-OH...OOH TS at SMD/um052x/6-311++g(d,p) level of theory in pentyl ethanoate

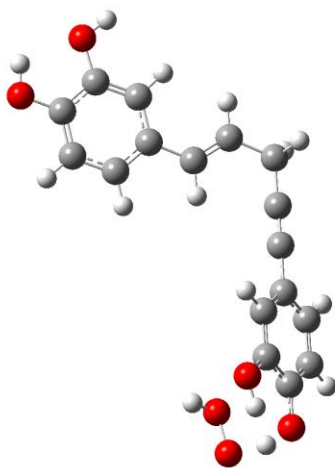

|   |              |              |              |
|---|--------------|--------------|--------------|
| 8 | -4.052296000 | -1.463218000 | -1.956939000 |
| 8 | -6.113831000 | -0.711296000 | -0.428313000 |
| 6 | 1.027117000  | 3.289195000  | 0.110858000  |
| 6 | -2.541295000 | 1.308649000  | -0.159020000 |
| 6 | -2.680510000 | 0.239114000  | -1.046136000 |
| 6 | -3.890744000 | -0.428491000 | -1.114882000 |
| 6 | -3.622086000 | 1.711660000  | 0.654271000  |
| 6 | -4.976791000 | -0.037937000 | -0.292449000 |
| 6 | -4.822732000 | 1.045460000  | 0.586537000  |
| 6 | -0.246105000 | 2.584664000  | 0.011187000  |

|   |              |              |              |
|---|--------------|--------------|--------------|
| 6 | -1.296736000 | 2.000531000  | -0.072583000 |
| 1 | -4.981247000 | -1.733924000 | -1.912229000 |
| 1 | -6.187333000 | -1.443862000 | 0.370630000  |
| 1 | 1.099904000  | 4.001057000  | -0.716930000 |
| 1 | 1.026746000  | 3.890442000  | 1.024057000  |
| 1 | -1.859652000 | -0.067600000 | -1.678551000 |
| 1 | -3.491303000 | 2.543201000  | 1.331095000  |
| 1 | -5.663252000 | 1.331193000  | 1.204518000  |
| 6 | 2.244291000  | 2.399180000  | 0.104759000  |
| 6 | 2.226168000  | 1.070410000  | 0.020842000  |
| 1 | 3.181190000  | 2.939371000  | 0.178471000  |
| 1 | 1.267671000  | 0.566536000  | -0.051493000 |
| 6 | 3.393239000  | 0.174627000  | 0.016515000  |
| 6 | 3.178934000  | -1.200197000 | -0.077793000 |
| 6 | 4.713486000  | 0.637488000  | 0.105037000  |
| 6 | 4.240404000  | -2.099718000 | -0.084931000 |
| 1 | 2.165782000  | -1.574034000 | -0.145507000 |
| 6 | 5.765666000  | -0.255543000 | 0.097779000  |
| 1 | 4.929456000  | 1.696145000  | 0.180283000  |
| 6 | 5.538999000  | -1.633244000 | 0.002781000  |
| 1 | 4.070113000  | -3.165252000 | -0.157393000 |
| 8 | 6.584793000  | -2.498846000 | -0.002474000 |
| 1 | 7.402516000  | -1.992876000 | 0.067258000  |
| 8 | 7.082231000  | 0.106738000  | 0.179149000  |
| 1 | 7.169828000  | 1.062549000  | 0.246982000  |
| 8 | -4.614579000 | -1.893886000 | 1.634528000  |
| 1 | -3.989814000 | -2.505654000 | 1.210835000  |
| 8 | -5.842373000 | -2.337290000 | 1.282966000  |

Optimized geometry of rooperol allylic H $\cdots$ OOH TS (in back of molecular plane) at SMD/um052x/6-311++g(d,p) level of theory in pentyl ethanoate

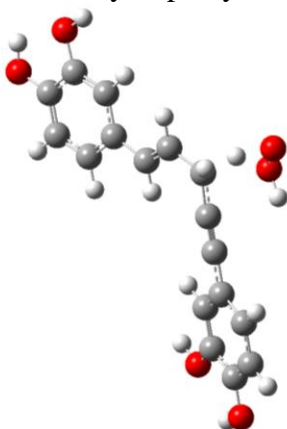

|   |              |              |              |
|---|--------------|--------------|--------------|
| 8 | -4.439875000 | -2.823585000 | 0.913038000  |
| 8 | -6.722285000 | -1.803187000 | 0.013904000  |
| 6 | 0.195800000  | 2.528424000  | -0.864834000 |
| 6 | -3.236764000 | 0.383078000  | -0.456865000 |
| 6 | -3.199844000 | -0.872450000 | 0.167905000  |
| 6 | -4.365343000 | -1.594634000 | 0.322367000  |
| 6 | -4.456271000 | 0.889577000  | -0.914073000 |
| 6 | -5.585107000 | -1.085590000 | -0.138574000 |
| 6 | -5.622995000 | 0.155914000  | -0.753208000 |
| 6 | -1.006760000 | 1.751756000  | -0.773380000 |
| 6 | -2.031424000 | 1.128740000  | -0.620545000 |
| 1 | -3.566966000 | -3.134041000 | 1.174051000  |

|   |              |              |              |
|---|--------------|--------------|--------------|
| 1 | -6.507454000 | -2.638834000 | 0.445172000  |
| 1 | 0.161452000  | 3.274854000  | -1.657653000 |
| 1 | 0.131664000  | 3.239285000  | 0.141565000  |
| 1 | -2.259773000 | -1.272669000 | 0.526917000  |
| 1 | -4.485749000 | 1.855753000  | -1.396644000 |
| 1 | -6.572981000 | 0.534298000  | -1.104639000 |
| 6 | 1.487159000  | 1.825290000  | -0.762835000 |
| 6 | 1.626474000  | 0.542141000  | -0.397440000 |
| 1 | 2.355736000  | 2.437490000  | -0.973109000 |
| 1 | 0.730838000  | -0.043517000 | -0.217860000 |
| 6 | 2.886959000  | -0.182893000 | -0.236038000 |
| 6 | 2.846328000  | -1.565550000 | -0.044383000 |
| 6 | 4.138469000  | 0.450641000  | -0.264322000 |
| 6 | 4.012026000  | -2.307795000 | 0.102147000  |
| 1 | 1.888549000  | -2.067920000 | -0.014522000 |
| 6 | 5.294133000  | -0.287264000 | -0.117572000 |
| 1 | 4.215654000  | 1.523659000  | -0.389937000 |
| 6 | 5.241737000  | -1.674852000 | 0.064890000  |
| 1 | 3.980542000  | -3.378681000 | 0.248236000  |
| 8 | 6.384930000  | -2.388802000 | 0.210674000  |
| 1 | 7.135425000  | -1.785821000 | 0.154711000  |
| 8 | 6.553452000  | 0.244882000  | -0.127867000 |
| 1 | 6.519705000  | 1.198772000  | -0.250861000 |
| 8 | -0.183639000 | 3.755479000  | 1.351461000  |
| 8 | -0.541529000 | 2.666732000  | 2.082248000  |
| 1 | -1.482539000 | 2.538011000  | 1.887474000  |

Optimized geometry of rooperol allylic H...<sup>\*</sup>OOH TS (in front of molecular plane) at SMD/um052x/6-311++g(d,p) level of theory in pentyl ethanoate

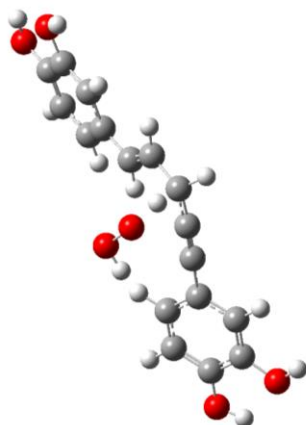

|   |              |              |              |
|---|--------------|--------------|--------------|
| 8 | -6.691604000 | -0.207325000 | 1.096519000  |
| 8 | -6.469522000 | -2.231491000 | -0.611787000 |
| 6 | 0.171927000  | 2.346523000  | 0.917384000  |
| 6 | -3.125413000 | 0.072116000  | 0.200602000  |
| 6 | -4.347601000 | 0.363984000  | 0.823481000  |
| 6 | -5.457794000 | -0.406988000 | 0.546506000  |
| 6 | -3.046946000 | -0.997171000 | -0.695718000 |
| 6 | -5.375937000 | -1.478335000 | -0.350170000 |
| 6 | -4.169235000 | -1.766395000 | -0.967872000 |
| 6 | -0.989632000 | 1.525096000  | 0.727457000  |



|   |              |              |              |
|---|--------------|--------------|--------------|
| 6 | -1.971581000 | 0.863704000  | 0.483239000  |
| 1 | -6.674194000 | 0.522634000  | 1.723694000  |
| 1 | -7.209676000 | -1.897096000 | -0.091433000 |
| 1 | 0.119517000  | 3.109381000  | -0.050525000 |
| 1 | 0.076017000  | 3.040658000  | 1.751189000  |
| 1 | -4.418701000 | 1.189008000  | 1.520785000  |
| 1 | -2.105810000 | -1.222655000 | -1.176812000 |
| 1 | -4.122133000 | -2.597443000 | -1.657972000 |
| 6 | 1.493994000  | 1.704106000  | 0.821132000  |
| 6 | 1.695738000  | 0.445273000  | 0.402037000  |
| 1 | 2.329908000  | 2.341349000  | 1.083047000  |
| 1 | 0.829594000  | -0.167732000 | 0.175823000  |
| 6 | 2.987994000  | -0.221871000 | 0.244674000  |
| 6 | 3.007332000  | -1.600588000 | 0.021517000  |
| 6 | 4.211682000  | 0.461740000  | 0.309471000  |
| 6 | 4.204910000  | -2.291605000 | -0.118147000 |
| 1 | 2.071107000  | -2.139919000 | -0.038009000 |
| 6 | 5.398793000  | -0.225279000 | 0.167886000  |
| 1 | 4.242021000  | 1.533901000  | 0.459610000  |
| 6 | 5.406510000  | -1.609610000 | -0.043865000 |
| 1 | 4.219656000  | -3.359295000 | -0.288746000 |
| 8 | 6.581370000  | -2.271553000 | -0.182488000 |
| 1 | 7.303398000  | -1.635792000 | -0.114147000 |
| 8 | 6.635382000  | 0.356667000  | 0.211564000  |
| 1 | 6.560427000  | 1.308612000  | 0.331370000  |
| 8 | -0.133814000 | 3.636640000  | -1.270167000 |
| 8 | -0.248493000 | 2.541356000  | -2.066550000 |
| 1 | -1.176127000 | 2.271856000  | -1.982281000 |
